# Supplementary material
Source: publisher figshare collection journal article supplement (https://acs.figshare.com/ndownloader/files/15579908)

# **Nitrate and Nitrites in Foods: Worldwide Regional Distribution in View of Their Risks and Benefits**

Zeynep Kalaycıoğlu<sup>a</sup> and F. Bedia Erim<sup>a,\*</sup>

<sup>a</sup>Istanbul Technical University, Department of Chemistry, Maslak, Istanbul, Turkey

\*Corresponding author. Tel: 90-212-2853151

E-mail address: erim@itu.edu.tr (F.B.Erim)

## SUPPORTING INFORMATION

**Table S1:** Maximum concentration allowed in legislation for food samples covered in this review according to the countries.

|                                                                       | Nitrite<br>(mg kg <sup>-1</sup> ) | Nitrate<br>(mg kg <sup>-1</sup> ) |
|-----------------------------------------------------------------------|-----------------------------------|-----------------------------------|
| <b>European Union Legislation<sup>1</sup></b>                         |                                   |                                   |
| Sausages, cold cuts, cured meat products, preserved meat products     | 150                               | 150                               |
| Traditionally cured products                                          | 50-180                            |                                   |
| Bacon                                                                 | 150                               | 250                               |
| Ham                                                                   | 100                               | 250                               |
| Cheese                                                                | 150                               | 150                               |
| Fresh spinach                                                         |                                   | 3000                              |
| Preserved, deep frozen, frozen spinach                                |                                   | 2000                              |
| Fresh lettuce                                                         |                                   | 2500                              |
| Processed cereal-based foods                                          |                                   | 200                               |
| Baby foods for infants and young children                             |                                   | 200                               |
| <b>The United States Department of Agriculture (USDA)<sup>2</sup></b> |                                   |                                   |
| Bacon                                                                 | 120                               |                                   |
| Dry cured bacon, brine cured or injected products such as ham         | 200                               |                                   |
| Frankfurters, cured sausage                                           | 156                               |                                   |
| Dry-cured meat products                                               | 625                               | 2187                              |
| <b>Turkish Food Codex<sup>3</sup></b>                                 |                                   |                                   |
| Sucuk and pastırma                                                    | 50                                | 150                               |
| Cured meat and meat products                                          | 50                                | 250                               |
| Cheese                                                                |                                   | 50                                |
| Fresh spinach                                                         |                                   | 2500-3000                         |
| Lettuce                                                               |                                   | 2500-4500                         |
| <b>Korean<sup>4</sup></b>                                             |                                   |                                   |
| Processed meats                                                       | 70                                |                                   |
| Processed fish sausage                                                | 50                                |                                   |
| Jeotgal                                                               | 5                                 |                                   |
| <b>Sudanese<sup>5</sup></b>                                           |                                   |                                   |
| Processed meat products                                               | 100                               |                                   |
| <b>Thailand<sup>6</sup></b>                                           |                                   |                                   |
| Processed meats                                                       | 125                               | 500                               |
| <b>China<sup>7</sup></b>                                              |                                   |                                   |
| Certain cured meat products                                           | 200                               | 500                               |
| <b>Iran<sup>8</sup></b>                                               |                                   |                                   |
| Meat products                                                         | 120                               |                                   |

<sup>1</sup>European Commission. 2011. Commission regulation (EU) No 1129/2011 of 11 November 2011 amending Annex II to Regulation (EC) No 1333/2008 of the European Parliament and of the Council by establishing a Union list of food additives. Off J Eur Union. L 295/1-177. Available form: [https://www.fsai.ie/uploadedFiles/Reg1129\\_2011.pdf](https://www.fsai.ie/uploadedFiles/Reg1129_2011.pdf)

<sup>2</sup>United States Department of Agriculture (USDA). 1995. Processing inspectors' calculations handbook (FSIS Directive 7620.3). United States Department of Agriculture.

<sup>3</sup>Turkish Food Codex, Appendix 16, Ankara, 2008

<sup>4</sup>KFDA (Korea Food and Drug Administration) (2009) Nitrite. Korea food additives code. Korea Food and Drug Administration, Cheongwon, pp 235–236.

<sup>5</sup>Sudanese Federal Ministry of Health

<sup>6</sup>Thailand's Ministry of Public Health (No.281)

<sup>7</sup>Preservatives in Food Regulation (Cap. 132BD) in Hong Kong

<sup>8</sup>ISIRI. 2010. Sausages – specification and test method. Iranian National Standard, 2303. Tehran: ISIRI.

**Figure S1:** The maximum (a) nitrate and (b) nitrite values of the different meat products in Table 1

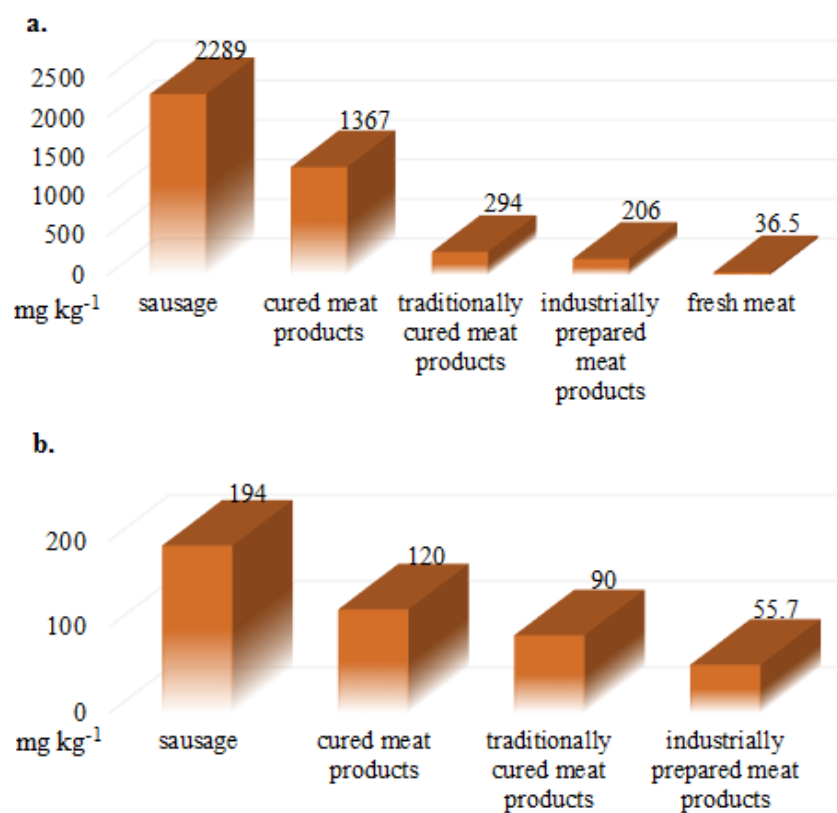

Supplement: Supplementary file 1 [file 15579908]
